# Supplementary material for: Oxygenated products formed from OH-initiated reactions of trimethylbenzene: Autoxidation and accretion
Source: Copernicus journal article supplement (doi:10.5194/acp-2020-165), 2020-03-23
Supplement: Supplementary file 1 [file acp-2020-165-supplement.pdf]

*Supplement of*

## **Oxygenated products formed from OH-initiated reactions of trimethylbenzene: Autoxidation and accretion**

Yuwei Wang<sup>1</sup>, Archit Mehra<sup>2</sup>, Jordan E. Krechmer<sup>3</sup>, Gan Yang<sup>1</sup>, Xiaoyu Hu<sup>1</sup>, Yiqun Lu<sup>1</sup>, Andrew Lambe<sup>3</sup>,  
Manjula Canagaratna<sup>3</sup>, Jianmin Chen<sup>1</sup>, Douglas Worsnop<sup>3</sup>, Hugh Coe<sup>2</sup>, Lin Wang<sup>1,4,5</sup> \*

<sup>1</sup> Shanghai Key Laboratory of Atmospheric Particle Pollution and Prevention (LAP<sup>3</sup>), Department of Environmental Science and Engineering, Jiangwan Campus, Fudan University, Shanghai 200438, China

<sup>2</sup> Centre for Atmospheric Science, School of Earth and Environment Sciences, The University of Manchester, Manchester, M13 9PL, UK

<sup>3</sup> Center for Aerosol and Cloud Chemistry, Aerodyne Research Inc., Billerica, MA, USA

<sup>4</sup> Collaborative Innovation Center of Climate Change, Nanjing 210023, China

<sup>5</sup> Shanghai Institute of Pollution Control and Ecological Security, Shanghai 200092, China

Contents of this file:

4 pages

Table S1

Figures S1-S3

Table S1 Relative abundance of the C9 and C18 oxidation products formed from TMB oxidation (Exp. #1-3 in Table 1), as measured by Nitrate CI-API-TOF. The percentages mean the relative intensity of this compound family to the total signals of detected C9 and C18 products with correction of the relative transmission efficiency of Nitrate CI-API-TOF obtained by the previously reported depletion method (Heinritzi et al., 2016). All of these products, except for C<sub>9</sub>H<sub>14</sub>O<sub>5</sub> that was detected in the 1,2,4-TMB and 1,2,3-TMB experiments, have more than 6 oxygen atoms, which meet the definition of HOMs from Bianchi et al (2019).

| Compound Family                                    | 1,3,5-TMB | 1,2,4-TMB | 1,2,3-TMB |
|----------------------------------------------------|-----------|-----------|-----------|
| C <sub>9</sub> H <sub>12</sub> O <sub>6-11</sub>   | 1.9 %     | 6.6 %     | 7.5 %     |
| C <sub>9</sub> H <sub>14</sub> O <sub>5-11</sub>   | 5.9 %     | 10.2 %    | 18.3 %    |
| C <sub>9</sub> H <sub>16</sub> O <sub>6-10</sub>   | 5.7 %     | 9.6 %     | 11.8 %    |
| C <sub>18</sub> H <sub>24</sub> O <sub>8-13</sub>  | 3.2 %     | 4.9 %     | 4.0 %     |
| C <sub>18</sub> H <sub>26</sub> O <sub>8-15</sub>  | 33.4 %    | 23.1 %    | 26.5 %    |
| C <sub>18</sub> H <sub>28</sub> O <sub>9-15</sub>  | 44.9 %    | 39.0 %    | 26.9 %    |
| C <sub>18</sub> H <sub>30</sub> O <sub>12-15</sub> | 5.1 %     | 6.6 %     | 5.0 %     |

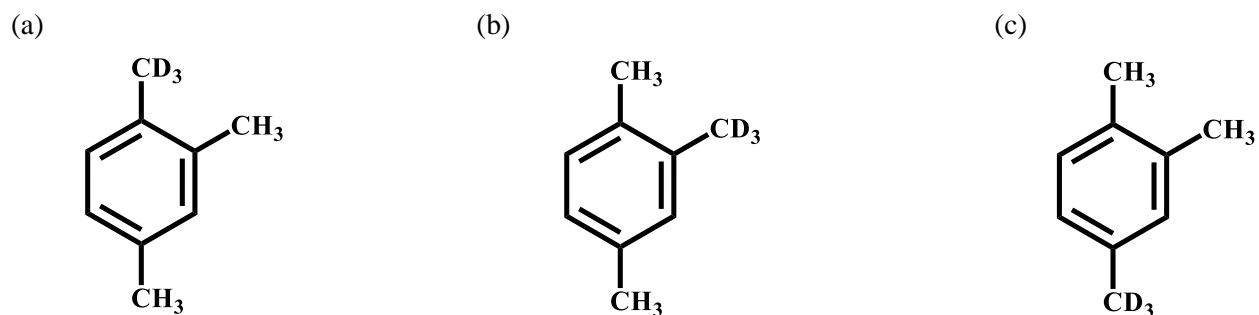

**Figure S1.** Molecular structure of three partially deuterated precursors. (a) 1,2,4-(1-methyl-D3)-TMB; (b) 1,2,4-(2-methyl-D3)-TMB; and (c) 1,2,4-(4-methyl-D3)-TMB.

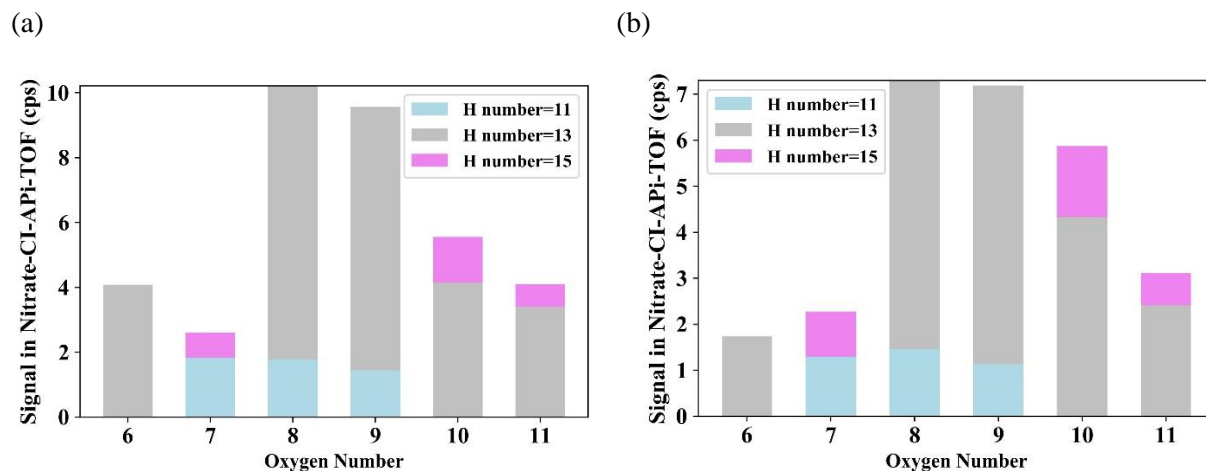

**Figure S2.** (a) Distribution of  $C_9H_xN_1O_y$  formed from 1,2,4-TMB under low  $NO_x$  conditions, as detected by Nitrate Cl-API-TOF; and (b) Distribution of  $C_9H_xN_1O_y$  formed from 1,2,4-TMB under higher  $NO_x$  conditions, as detected by Nitrate Cl-API-TOF.

(a)

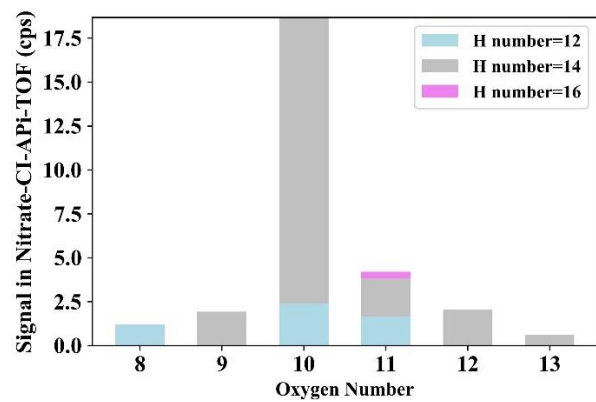

(b)

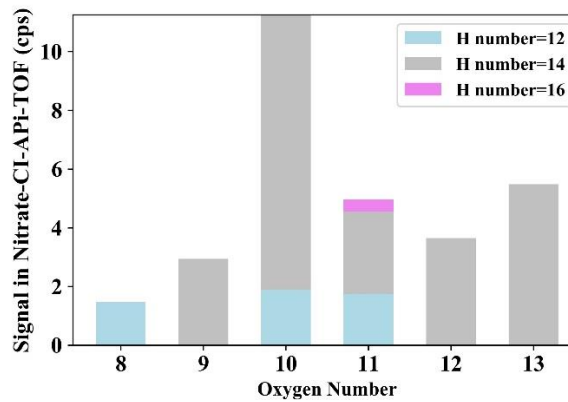

**Figure S3.** (a) Distribution of  $C_9H_xN_2O_y$  formed from 1,2,4-TMB under low  $NO_x$  conditions, as detected by Nitrate CI-API-TOF; and (b) Distribution of  $C_9H_xN_2O_y$  formed from 1,2,4-TMB under higher  $NO_x$  conditions, as detected by Nitrate CI-API-TOF.
